# Supplementary material for: Rapid activation of ARF6 after RAF inhibition augments BRAFV600E and promotes therapy resistance
Source: Research Square preprint supplement (doi:10.21203/rs.3.rs-7133814/v1), 2025-08-27
Supplement: Supplementary file 1 [file fff4f86250f6c27faa6fbb0f.docx]

Key Resource Table

**Antibodies**

| Target Antigen | Clone | Vendor | | Catalog# | | Working  Dilution |
| --- | --- | --- | --- | --- | --- | --- |
| Antibodies (Western Blot-Primary antibodies) | | |
| ARF6 | D12G6 | Cell Signaling Technology | | 5740 | | 1:1000 |
| a-tubulin | DM1A | Cell Signaling Technology | | 3873 | | 1:1000 |
| HA | C29F4 | Cell Signaling Technology | | 3724 | | 1:1000 |
| GAPDH | D16H11 | Cell Signaling Technology | | 5174 | | 1:10000 |
| BRAF | EP152Y | Abcam | | Ab33899 | | 1:1000 |
| BRAFV600E |  | NewEast Biosciences | | 26039 | | 1:1000 |
| p-MEK1/2(S217/221) | 41G9 | Cell Signaling Technology | | 9154 | | 1:1000 |
| MEK1/2 |  | Cell Signaling Technology | | 9122 | | 1:1000 |
| p-ERK1/2(T202/Y204) | D13.14.4E | Cell Signaling Technology | | 4370 | | 1:1000 |
| ERK1/2 | 137F5 | Cell Signaling Technology | | 4695 | | 1:1000 |
| MCL-1 | D35A5 | Cell Signaling Technology | | 5453 | | 1:1000 |
| FOXO3a | D19A7 | Cell Signaling Technology | | 12829 | | 1:1000 |
| BAX |  | Cell Signaling Technology | | 2772 | | 1:1000 |
| p-BAD (S112) |  | Cell Signaling Technology | | 9291 | | 1:1000 |
| BAD |  | Cell Signaling Technology | | 9292 | | 1:1000 |
| BIM | C34C5 | Cell Signaling Technology | | 2933 | | 1:1000 |
| β-Tubulin | D3U1W | Cell Signaling Technology | | 86298 | | 1:2500 |
| Antibodies (Western Blot-Secondary antibodies) | | | | |
| IgG |  | Jackson ImmunoResearch | | 715-035-152 | | 1:5000 |
| IgG |  | Jackson ImmunoResearch | | 711-035-152 | | 1:5000  (1:10000 for  GAPDH) |

**Chemical Compounds**

| Chemical compound | Vendor | Catalog# |
| --- | --- | --- |
| Vemurafenib | Selleck Chemicals | 300-02 |
| Dabrafenib | MedKoo Biosciences | 205479 |
| Trametinib | MedKoo Biosciences | 201458 |
| Bafilomycin A1 | Sigma-Aldrich | SML1661 |
| QS11 | Tocris Bioscience | 3324 |
| SecinH3 | MedChem Express | HY-100559 |
| NAV-2729 | Tocris Bioscience | 5986 |
| 17-AAG | MedChem Express | HY-10211 |
| Cycloheximide | Sigma-Aldrich | C4859 |

**Vectors**

| Target gene | Source clone ID | Vendor | Catalog# | Gene target sequence |
| --- | --- | --- | --- | --- |
| piSMART hEF1a/TurboGFP | | | | |
| ARF6 | V3IHSHEG_9625081 | Horizon Discovery | V3SH11252-229687431 | CGACCGCATCGATGAGGCT |
|  |  |  |  |  |
|  |  |  |  |  |
| Ad-CMV Null | | | | |
| Empty vector |  | Vector Biolabs | 1300 |  |

**Oligonucleotides**

| Oligonucleotides (qRT-PCR) |  |  |
| --- | --- | --- |
| *BRAF* Forward sequence | 5’-GGCATGGATTACTTACACGCC-3’ | |
| *BRAF* Reverse sequence | 5’-CTGTTCAAACTGATGGGACCC-3’ | |
| *GAPDH* Forward sequence | 5’-GTCTCCTCTGACTTCAACAGCG-3’ | |
| *GAPDH* Forward sequence | 5’-ACCACCCTGTTGCTGTAGCCAA-3’ | |
